# Supplementary material
Source: PubMed Central journal article supplement (PMC1937558)

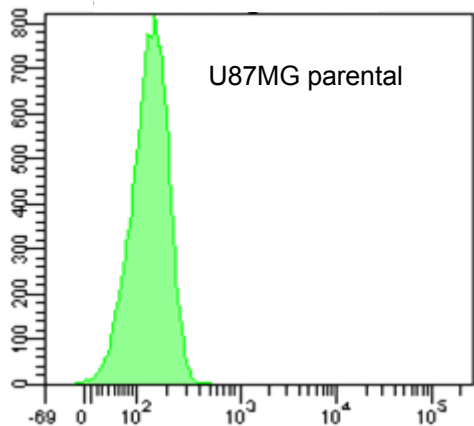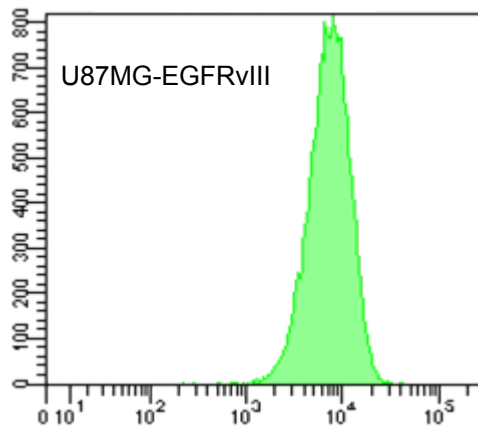

Relative EGFRvIII expression

| U87MG cell line:   | parental | EGFRvIII | vIII-M | vIII-H | vIII-SH |
|--------------------|----------|----------|--------|--------|---------|
| Mean fluorescence: | 136      | 7,786    | 5,795  | 8,559  | 10,845  |

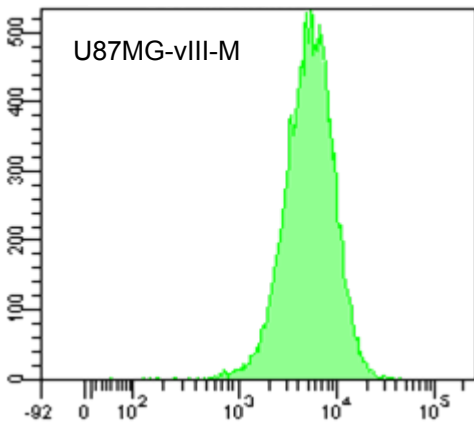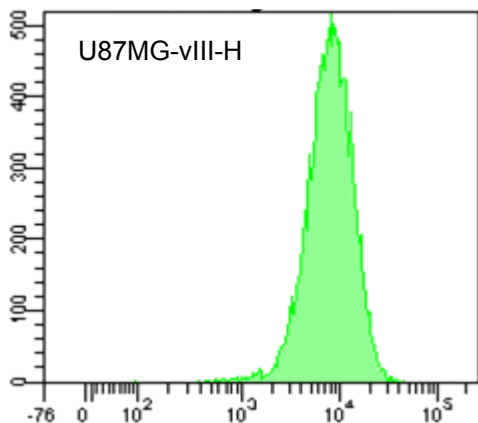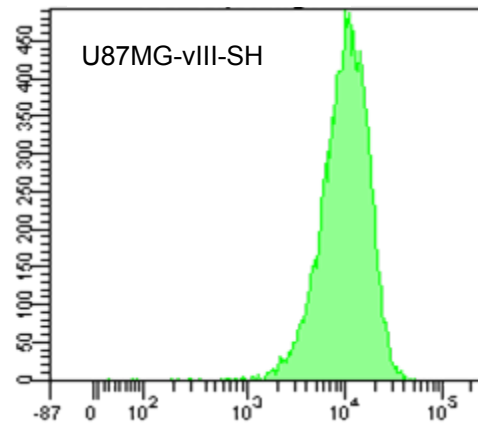

Supplement: pnas_0705158104_1.pdf [file pnas_0705158104_1.pdf]
