# Supplementary material
Source: PubMed Central journal article supplement (PMC1937558)

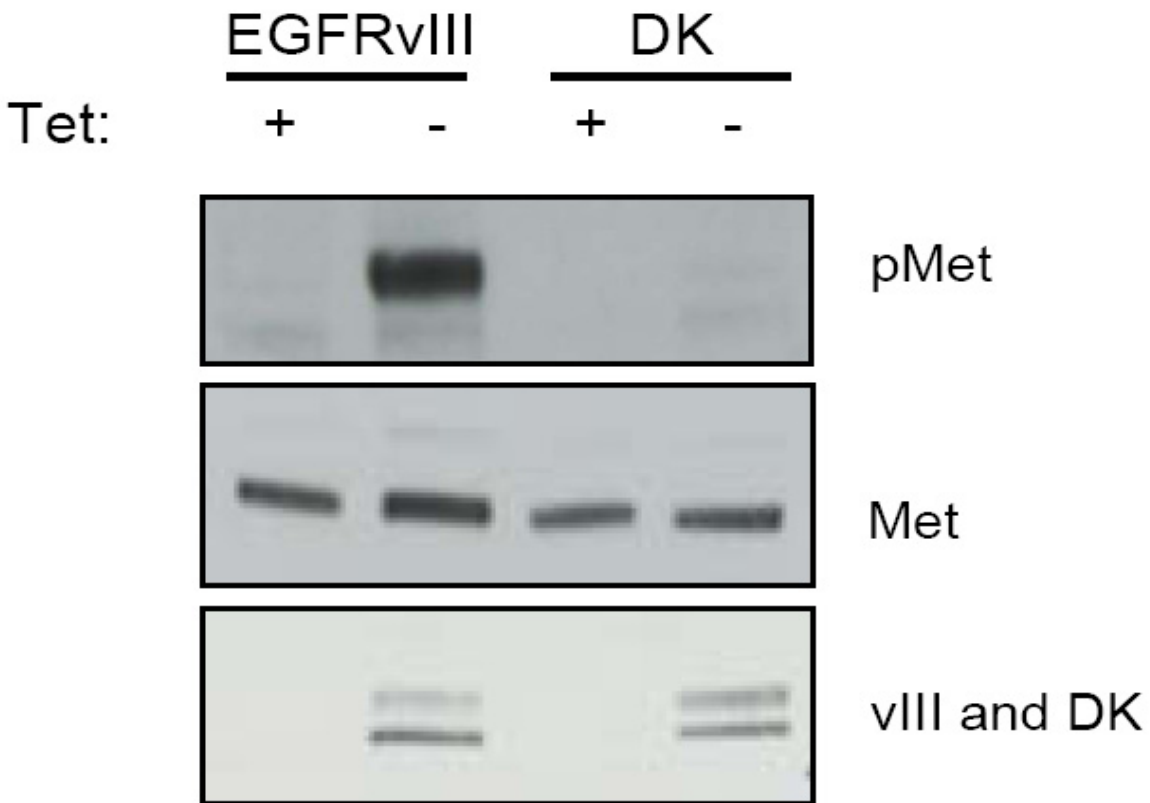

Supplement: pnas_0705158104_2.pdf [file pnas_0705158104_2.pdf]

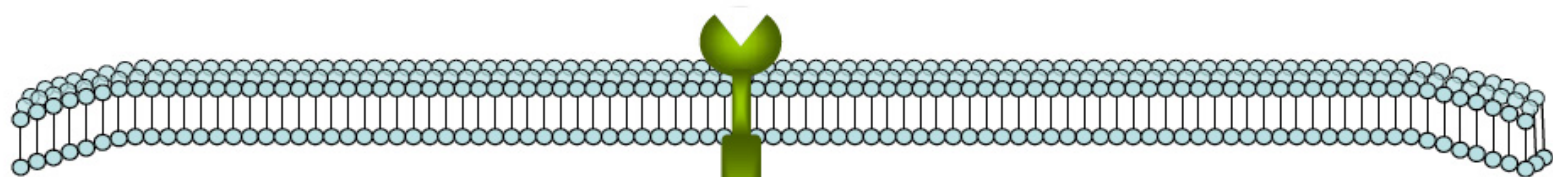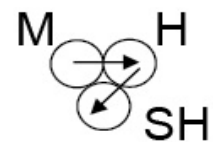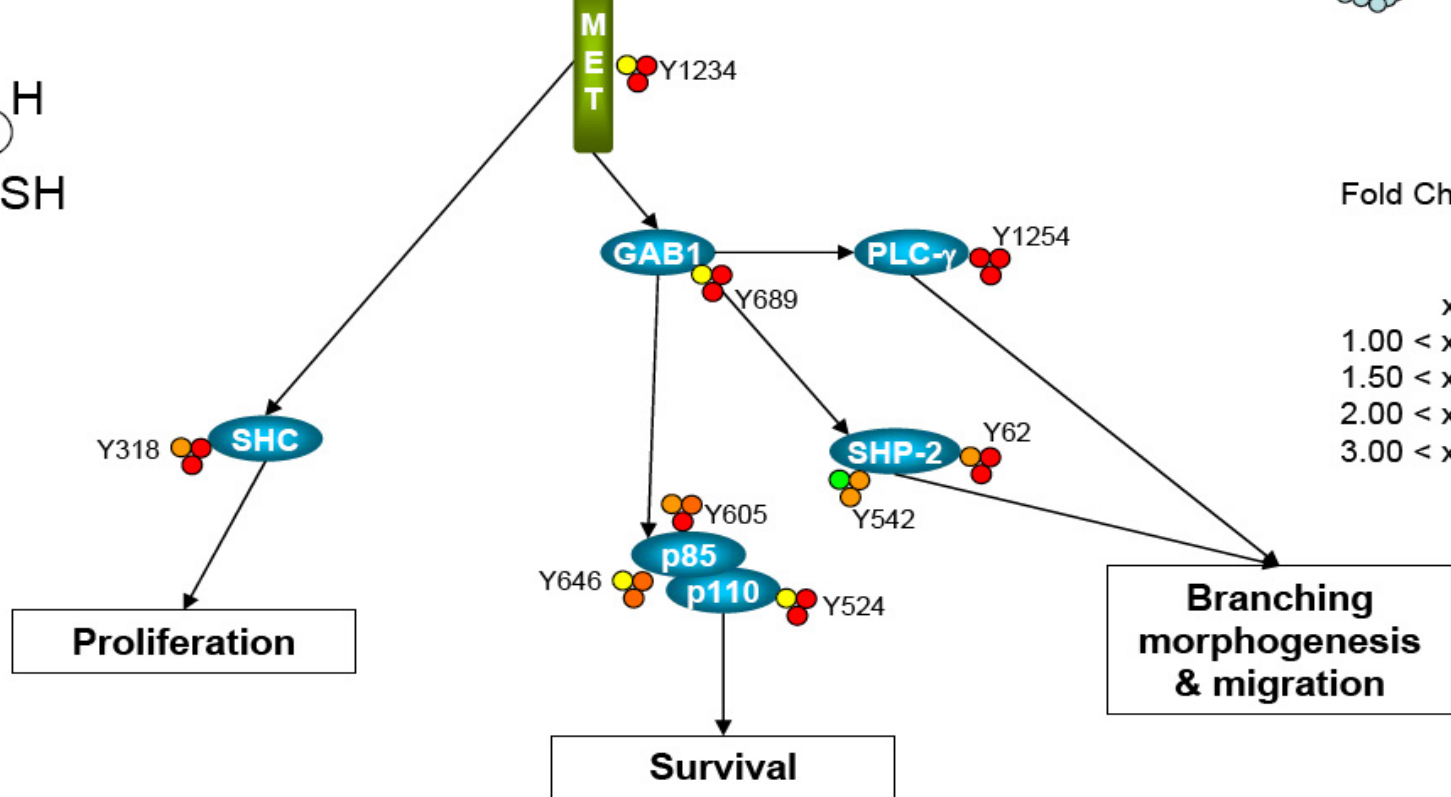

Supplement: pnas_0705158104_3.pdf [file pnas_0705158104_3.pdf]

**A**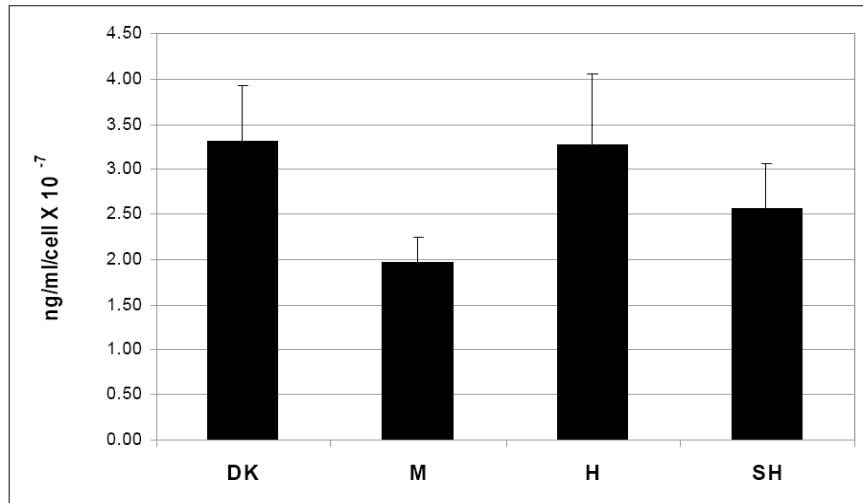**B**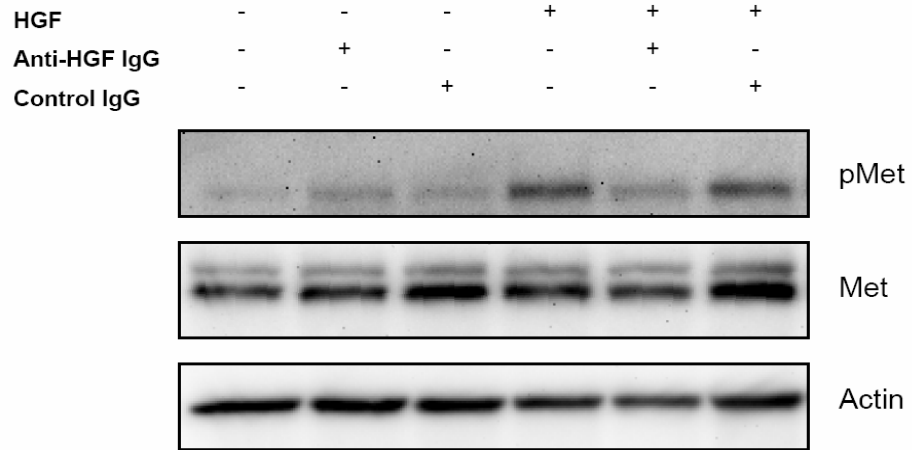

Supplement: pnas_0705158104_4.pdf [file pnas_0705158104_4.pdf]

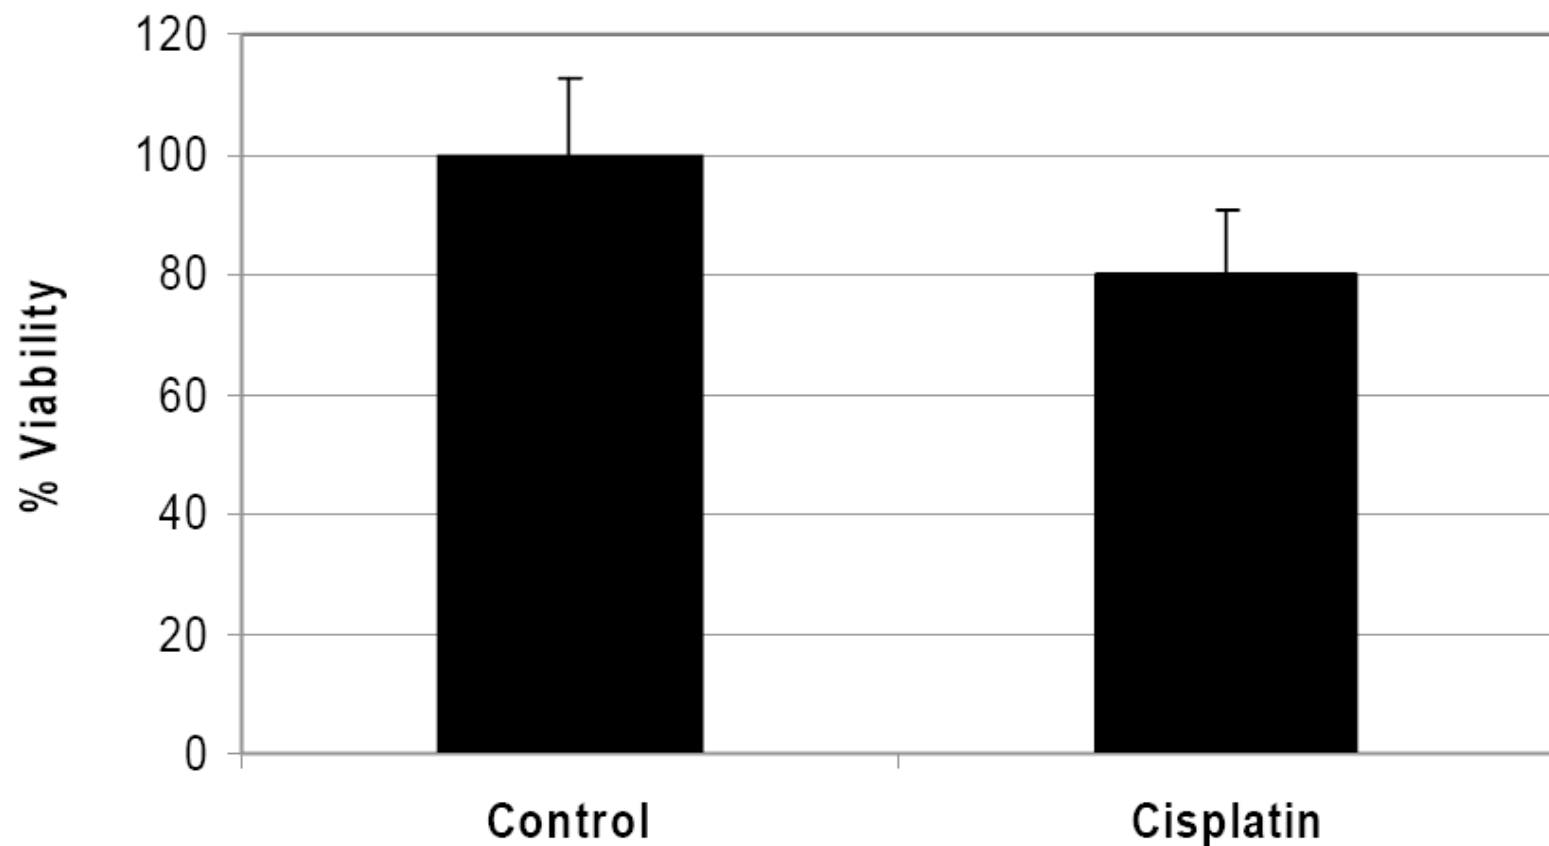

Supplement: pnas_0705158104_5.pdf [file pnas_0705158104_5.pdf]
